# Supplementary material for: Electron Transport Chain Complex II Regulates Steroid Metabolism
Source: PubMed Central journal article supplement — iScience. 2020 Jun 20;23(7):101295. doi: 10.1016/j.isci.2020.101295 (PMC7334606; doi:10.1016/j.isci.2020.101295), 2020-06-20
Supplement: mmc1.pdf [file mmc1.pdf]

**iScience, Volume 23**

## **Supplemental Information**

### **Electron Transport Chain Complex II**

#### **Regulates Steroid Metabolism**

**Himangshu S. Bose, Brendan Marshall, Dilip K. Debnath, Elizabeth W. Perry, and Randy M. Whittal**

**SUPPLEMENTAL INFORMATION**

## Transparent Methods

### *Cell proliferation and isolation of mitochondria from tissues*

MA-10 cells (Mouse Leydig) were cultured in Weymouth media (Sigma, St. Louis, MO) in the presence of 1X L-Glutamine, 10% horse serum and 5% FBS. Cells were kept at 37°C in a humidified incubator with 5% CO<sub>2</sub> and mitochondria were isolated as described before (Bose et al., 2002). Sheep Adrenal glands, were obtained from the University of Florida, Gainesville, Animal Science Department, immediately after sacrifice. Tissues were diced in an ice-cold mitochondria isolation buffer containing 250mM sucrose (Bose et al., 2008), and mitochondria were isolated using a hand-held, all glass Dounce homogenizer following a previously described protocol (Bose et al., 2008). Most of the experiments were carried out with freshly isolated mitochondria from either cells or tissues. Malate dehydrogenase knockdown in MA-10 cells was performed with the silencing vector from Open Biosystem (Santa Cruz Biotechnology) and the knockdowns were selected with the antibiotic (50 µg/ml) hygomycin. Out of the five plasmids provided by the manufacturer only two plasmids were able to knockdown, as determined by western blotting with MDH2 antibody (Santa Cruz).

### *Isolation and fractionation of mitochondria*

Mitochondria were isolated from mouse testis or sheep adrenals or cultured MA-10 cells by differential centrifugation as described previously (Bose et al., 2008). Mitochondrial pellets were resuspended in a 1:1 mix buffer and kept on ice. Mitoplasts were prepared by solubilizing the outer mitochondrial matrix (OMM) in 1.2 % (w/v) digitonin, a non-ionic detergent. Prior to digitonin treatment, mitochondria were incubated with 10mM HEPES (pH 7.4) for 5 min and centrifuged at 10,000 ×g for 20 min to separate the OMM from the inner mitochondrial matrix (IMM) and matrix (mitoplast). The OMM fraction was centrifuged at 130,000 ×g for 1 h to separate unimported SCC from the pellet membranes. IMM and matrix fractions were prepared by the treatment of mitoplasts with 0.16 mg of non-ionic lubrol (Ragan et al., 1986) per mg of mitochondria followed by ultracentrifugation at 130,000 ×g for 1 h. The soluble fraction was referred to as the matrix and insoluble part as the IMM, although it should be noted that this fraction also contains some intermembrane space (IMS) components. The matrix fraction

30 (supernatant) was removed, and the membrane pellet was resuspended in 1:1 mix buffer and kept on ice.  
31 The volume of the supernatant was measured, and the membrane pellet was resuspended in 1:1 mix buffer.

### 32 ***Western blot***

33 For native Western staining, mitochondria were isolated from rat adrenal or testicular tissues or  
34 from the MA-10 cells following our previously described procedure (Pawlak et al., 2011a). The native  
35 complex was isolated by incubating mitochondria with buffer containing 1% digitonin, and samples were  
36 separated by electrophoresis through 4-16% native gradient gels. For denatured Western blotting, 12.5 mg  
37 of total or mitochondrial proteins were loaded per well. After the protein complexes from the native PAGE  
38 or SDS-PAGE were transferred to a polyvinylidene difluoride (PVDF) membrane, they were blocked with  
39 3% nonfat dry milk for 45 min, probed overnight with the primary antibodies, and then incubated with  
40 peroxidase-conjugated goat anti-rabbit IgG or anti mouse IgG (Pierce, Rockford, IL). Signals were  
41 developed with a chemiluminescent reagent (Pierce). For direct visualization of the complexes, the gels  
42 were stained with Serva blue or Coomassie blue stain overnight at 4 °C. Unless otherwise indicated,  
43 antibodies to P450c11AS, VDAC2, and StAR were all purchased from Santa Cruz Biotechnology (Santa  
44 Cruz Biotech, Dallas, TX) or AbCam (Boston, MA). For antibody shift experiment, MA-10 cells were  
45 stimulated with cAMP for 18 h and then the mitochondria were isolated as described above. The  
46 mitochondrial pellet was solubilized with 1% digitonin, and then specific antibody was added at a  
47 previously determined dilution for 60 min. The antibody complex was isolated by centrifugation at 9000  
48 rpm (Beckman Allegra 22XR, F630 rotor) for 45 min, resolved by 4 to 16% native gradient PAGE,  
49 transferred to a PVDF membrane, and western blotted with specific antibodies as described previously  
50 (Prasad et al., 2017).

### 51 ***In vitro* synthesis and processing of the precursor protein with different mitochondrial fractions**

52 The full-length SCC cDNA was subcloned in SP6 vector and the protein was translated in a rabbit  
53 reticulocyte transcription translation system in the presence of <sup>35</sup>S-labeled methionine following  
54 manufacturer's instructions (Promega, Madison, WI). Freshly isolated mitochondria were incubated with  
55 a <sup>35</sup>S-labeled SCC or mutant SCC at 26° C for 1 h or as needed. The imported fractions were separated

56 from the unimported fraction by extraction with sodium carbonate as described previously (Bose et al.,  
57 2002). The membrane integrity was determined by proteolysis with proteinase K as described previously  
58 (Bose et al., 2019; Bose et al., 2002).

59 To confirm that the unimported form is not an aggregate, we performed ultracentrifugation of cell  
60 free transcription translation system (CFS) at 144,000  $\times g$  before incubation with mitochondria. Partial  
61 proteolysis was performed with PK or trypsin independently with varying concentrations from 10  $\mu g$  to  
62 250  $\mu g$  for PK and 1 to 100 Units of sequencing grade trypsin (Thermo Fisher). The import reactions were  
63 carried out at 26° C. In some experiments import reactions were carried out at different temperatures and  
64 also in presence of different inhibitors where Oligomycin 50  $\mu g/mL$ , valinomycin 2.0  $\mu g/mL$  and  
65 atractloside (CTL) 50  $\mu g/mL$  were added just prior to start  $^{35}S$ -SCC mitochondrial import. Similarly to  
66 study preunfolded  $^{35}S$ -SCC was incubated with 1.0M urea in 10mM Tris buffer pH 7.4 and incubated with  
67 the freshly isolated mitochondria from MA-10 cells and import reactions were carried out at 26° C for 1 h  
68 and terminated by adding mCCCp.

69 For analysis of the assembled proteins in the complex, mitochondria from the transfected cells or  
70 testicular tissues were re-isolated and lysed in digitonin buffer (1% digitonin, 20mM Tris-HCl, pH 7.4,  
71 0.1mM EDTA, 50mM NaCl, 10% glycerol, 1mM phenylmethylsulfonyl fluoride) for 15 min on ice. The  
72 digitonin lysate was combined with native-PAGE sample buffer (5% Coomassie Brilliant Blue G-250,  
73 100mM BisTris, pH 7.0, 500mM 6-aminocaproic acid) and subjected to 4–16% or 6-13% gradient native-  
74 PAGE at 100 V overnight at 4° C. The native page was stained following electrophoresis to avoid any  
75 aberrant complex. Protein complexes were further fractionated by applying 100  $\mu L$  of digitonin lysate to  
76 a 30-10% sucrose density step gradient, with a 200- $\mu L$  66% sucrose cushion at the bottom (final volume  
77 = 2.0 mL). Following centrifugation at 55,000  $\times g$  in a Beckman TLA55 rotor for 4 h, the sample was  
78 immediately equally aliquoted and loaded onto gradient, native-PAGE or SDS-PAGE gels. Radiolabeled  
79 proteins were detected by autoradiography or on a phosphorimager.

80 ***Expression kinetics of SCC in COS-1 cells***

81 SCC cDNA was subcloned in the pCMV vector as described previously (Bose et al., 2019), and  
82 plasmid cDNA was purified through Qiagen Midi prep columns (Qiagen, Frederick, MD) following the  
83 manufacturer's procedure. Briefly,  $1 \times 10^6$  COS-1 cells were cultured onto a six-well plate 14 h before the  
84 transfection, and 2  $\mu$ g of cDNA was transfected in 3 wells using Lipofectamine (Thermo Fisher, Waltham,  
85 MA) as previously described (Bose et al., 2008). Following replacement of medium containing serum and  
86 antibiotics, cells were collected in every 4 h, and the SCC expression was determined by Western blotting  
87 with a SCC antibody (a kind gift from Dr. Bon-Chu Chung).

### 88 *Mitochondrial viability analysis*

89 We determined mitochondrial viability isolated from MA-10 cells or from rat testis following a  
90 recently developed procedure (Marriott et al., 2012; Prasad et al., 2016). In brief, mitochondrial membrane  
91 responsiveness was determined using an ATP Assay System Bioluminescence Detection Kit (ENLITEN,  
92 Promega) with a Veritas microplate luminometer (Turner Biosystems, Sunnyvale, CA) following the  
93 manufacturer's protocol. ATP production was inhibited by incubation of MA-10 cells with various  
94 concentrations of carbonyl cyanide m-chlorophenyl hydrazone (mCCCP) for 1 h as described previously  
95 (Prasad et al., 2017).

### 96 *Metabolic conversion/Activity assays*

97 To measure the conversion of cholesterol to pregnenolone, isolated mitochondria were incubated  
98 with 80,000 counts of  $^{14}$ C-cholesterol (PerkinElmer, Whatman, MA). Reactions were initiated by addition  
99 of 50  $\mu$ M NADPH (Sigma-Aldrich) and incubated at 37°C for 2 h in a shaking water bath. For conversion  
100 of progesterone analysis the reactions were performed with NADH following our published procedure  
101 (Pawlak et al., 2011b; Prasad et al., 2016). To stop pregnenolone to progesterone conversion, we have  
102 incubated with 3-beta Hydroxy steroid dehydrogenase inhibitor (3 $\beta$ HSD2) with 10 pmol of Trilostane  
103 (Tril) (Prasad et al., 2012). For digitonin solubilized complex activity was performed after isolation of the  
104 complex in presence and absence of digitonin and performed the conversion with NADH following the

105 same procedure. Steroids were extracted following our previous procedure (Pawlak et al., 2011b; Prasad  
106 et al., 2017; Prasad et al., 2016) and the amounts of steroid were determined by using a phosphorimager.

### 107 *Calorimetry*

108 Mitochondria were prepared as described previously and for the specific experiment 0.1 mg of  
109 mitochondrial protein was suspended in 1.5 mL of buffer (Bose et al., 2002). The solution was titrated  
110 with mitochondria, succinate and ATP in a MicroCal (Northampton, MA) VP-ITC calorimeter equipped  
111 with an automatic injector in the Department of Biochemistry and Molecular Biology at the University of  
112 Florida, Gainesville. All buffers were filtered through 0.22  $\mu\text{m}$  and degassed before use. Data were  
113 collected by incubating mitochondria in the cell for 2 h prior to the injection of succinate or cholesterol in  
114 5  $\mu\text{L}$  at a speed of 0.5  $\mu\text{L}/\text{s}$  with a gap of 7 min for each injection for equilibration. Enthalpy ( $\Delta H$ ) was  
115 measured by integration of excess power generated by the reaction divided by the concentration of the  
116 injectant.

### 117 *Transmission electron microscopy (TEM)*

118 To determine the precise localization of SCC in mice testis mitochondria, TEM experiments were  
119 carried out. Testes tissue was fixed overnight in 4% formaldehyde and 0.2% glutaraldehyde in 0.1M  
120 sodium cacodylate buffer, pH 7.4. Tissues were dehydrated through a graded ethanol series from 25% to  
121 95% and embedded in LR white resin. Sectioning was performed on a Leica EM UC6 ultramicrotome  
122 (Leica Microsystems, Bannockburn, IL), and 75nm-thick sections were collected on 200 mesh nickel  
123 grids. Sections were etched with 2%  $\text{H}_2\text{O}_2$ , quenched in 1M  $\text{NH}_4\text{Cl}$ , and blocked in 0.1% BSA in PBS for  
124 4 h at room temperature in a humidified atmosphere, followed by incubation with anti-SCC (1:1000  
125 dilution) in 0.1% BSA overnight at 4°C. Sections were washed in PBS (5 times) and floated on drops of  
126 anti-primary-specific, ultra-small (<1.0 nm) Nanogold<sup>TM</sup> reagent (Nanoprobes, Yaphank, NY) diluted  
127 1:2000 in 0.1% BSA in PBS at room temperature for 2-4 h. Sections were washed with PBS (5 times, 10  
128 min each) and deionized  $\text{H}_2\text{O}$  (5 times, 10 min each), prior to enhancement with HQ Silver<sup>TM</sup>  
129 (Nanoprobes) for 8 min. Enhancement was terminated by washing in cold deionized  $\text{H}_2\text{O}$ . For double

130 antibody immunolabeling, sections were labeled with anti-SCC (1:1000) overnight at 4°C, followed by  
131 incubation with anti-Calnexin (1:2000) overnight at 4°C. Silver enhancement of anti-SCC nanogold was  
132 twice the duration of anti-Calnexin nanogold. Thus, two different sizes of gold particles were obtained.  
133 Sections were then stained with 2% uranyl acetate in 70% ethanol, washed with deionized H<sub>2</sub>O (5 times,  
134 2 min each), and air dried. Average size of large gold particles was 55 nm in diameter with 90% being  
135 between 45-65 nm in diameter. Average size of small gold particles was 15 nm in diameter with 90% of  
136 the gold particles being <25 nm in diameter. Tissue sections were imaged using a JEM 1230 transmission  
137 electron microscope (JEOL Peabody, MA) at 110 kV and an UltraScan 4000 CCD camera and first Light  
138 Digital Camera Controller (Gatan Inc., Pleasanton, CA). Approximately 80 sections from each experiment  
139 were analyzed.

#### 140 *Figure preparation and data analysis*

141 The images were obtained from the autoradiographic films or scanning through a phosphorimager,  
142 and the data analysis was performed using, Kalidagraph, or Microsoft Excel.

143

144



145 **Supplementary Figure Legend**

146

147 **Figure S1** (Related to Figure 1, panels E-H). Enlarged EM of the mouse testis stained with SCC antibody.

148 The distance of mitochondria from the ER is shown in blue arrow.

149 **Figure S2** (Related to Figure 1, panels K-M). Analysis SCC processing. (A), Overexpression of SCC in

150 COS-1 cells at the indicated time detected by Western blotting with a SCC antibody. The red arrow head

151 shows the minimum start of expression and blue arrow head shows start of major conversion from 61 kDa

152 to 51 kDa. Bottom, Western blot of the same fractions from Panel A with VDAC2 antibody. (B), Density

153 gradient separation of the digitonin solubilized mouse mitochondrial tissue through sucrose density gradient

154 centrifugation and visualized by Western blotting with a SCC antibody. Appearance of 57-kDa and 51-kDa

155 SCC is indicated with black and red arrow. Bottom, The top membrane with longer exposure. (C), Western

156 staining of the same digitonin lysate fractions with a VDAC2 antibody.

157 **Figure S3** (Related to Figure 3). Difference in activity with pre and post incubation with succinate. (A), Thin

158 layer chromatography showing the metabolic conversion pattern. (B), Analysis of the role of succinate due to

159 pre and post incubation shown in a flow chart.

160 **Figure S4** (Related to Figure 4). Metabolic activity determination. (A), Measurement of activity ( $^{14}\text{C}$ -

161 cholesterol to pregnenolone conversion) with mitochondria isolated from MA-10 cells over different periods of

162 time from 5 min to 2 hour. (B), Measurement of activity ( $^3\text{H}$ -pregnenolone to progesterone conversion) with

163 mitochondria isolated from MA-10 cells as well as the digitonin lysate of the MA-10 mitochondria prepared in

164 presence and absence of succinate. Trilostane (Tril) was added to inhibit  $3\beta\text{HSD2}$  activity to stop conversion

165 after pregnenolone synthesis.

166 **Figure S5** (Related to Figure 5). Expression analysis of the malate dehydrogenase. Top, Western blot

167 analysis of malate dehydrogenase knock down stable clones 1 and 2, and its comparison with MA-10

168 cells with MDH2 antibody. Bottom, Western of the clones 1 and 2 from the top panel with pyruvate

169 dehydrogenase (PDC-E2) antibody.

SUPPLEMENTAL REFERENCES

- 170  
171  
172 Bose, H.S., Gebrail, F., Marshall, B., Perry, E.W., and Whittal, R.W. (2019). Inner mitochondrial  
173 translocase Tim 50 is central in adrenal and testicular steroid synthesis. *Mol Cell Biol* 39,  
174 doi:10.1128/MCB.00484-00418.
- 175 Bose, H.S., Lingappa, V.R., and Miller, W.L. (2002). Rapid regulation of steroidogenesis by  
176 mitochondrial protein import. *Nature* 417, 87-91.
- 177 Bose, M., Whittal, R.M., Miller, W.L., and Bose, H.S. (2008). Steroidogenic activity of StAR requires  
178 contact with mitochondrial VDAC1 and phosphate carrier protein. *J Biol Chem* 283, 8837-8845.
- 179 Marriott, K.C., Prasad, M., Thapliyal, V., and Bose, H.S. (2012). Sigma-1 receptor at the mitochondrial  
180 associated ER-membrane is responsible for mitochondrial metabolic regulation. *J Pharmacol Exp*  
181 *Ther* 343, 578-586.
- 182 Pawlak, K.J., Prasad, M., McKenzie, K.A., Wiebe, J.P., Gairola, C.G., Whittal, R.M., and Bose, H.S.  
183 (2011a). Decreased cytochrome c oxidase IV expression reduces steroidogenesis. *J Pharmacol*  
184 *Exp Ther* 338, 598-604.
- 185 Pawlak, K.J., Prasad, M., Thomas, J.L., Whittal, R.M., and Bose, H.S. (2011b). Inner mitochondrial  
186 translocase Tim50 interacts with 3beta-hydroxysteroid dehydrogenase type-2 to regulate adrenal  
187 and gonadal steroidogenesis. *J Biol Chem* 286, 39130-39140
- 188 Prasad, M., Pawlak, K.J., Burak, W.E., Perry, E.E., Marshall, B., Whittal, R.M., and Bose, H.S. (2017).  
189 Mitochondrial metabolic regulation by GRP78. *Science Advances* 3, e1602038.
- 190 Prasad, M., Thomas, J.L., Whittal, R.M., and Bose, H.S. (2012). Mitochondrial 3-beta hydroxysteroid  
191 dehydrogenase enzyme activity requires a reversible pH-dependent conformational change at the  
192 intermembrane space *J Biol Chem* 287, 9534-9546.
- 193 Prasad, M., Walker, A.N., Kaur, J., Thomas, J.L., Powell, S.A., Pandey, A.V., Whittal, R.M., Burak,  
194 W.E., Petruzzelli, G., and Bose, H.S. (2016). Endoplasmic reticulum stress enhances

195 mitochondrial metabolic activity in mammalian adrenals and gonads. *Mol Cell Biol* 36, 3058-  
196 3074.

197 Ragan, C.I., Wilson, M.T., Darley-Usmer, V.M., and Lowe, P.N. (1986). Sub-Fractionation of  
198 mitochondria and isolation of the proteins of oxidative phosphorylation (Washington, D.C.: IRL  
199 Press).

200

201

## SUPPLEMENTAL FIGURES

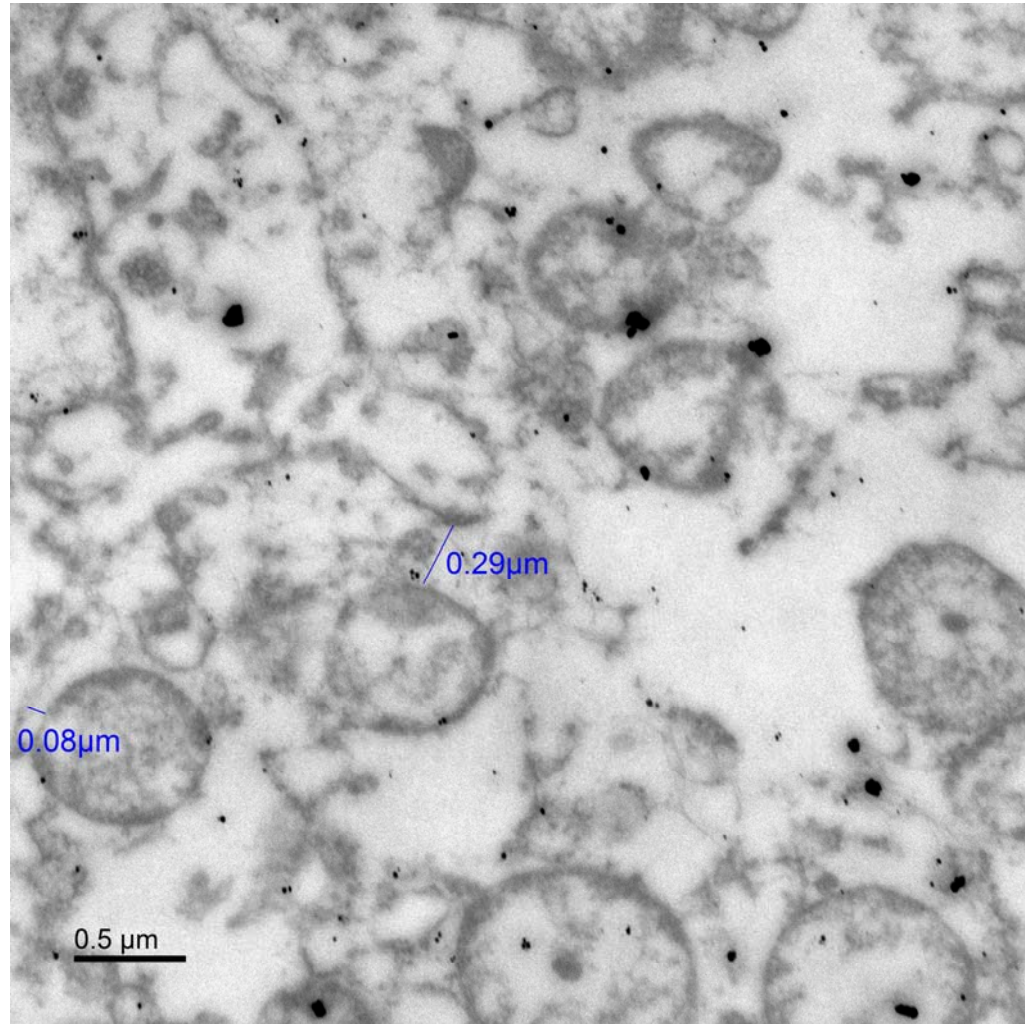

FIGURE S1

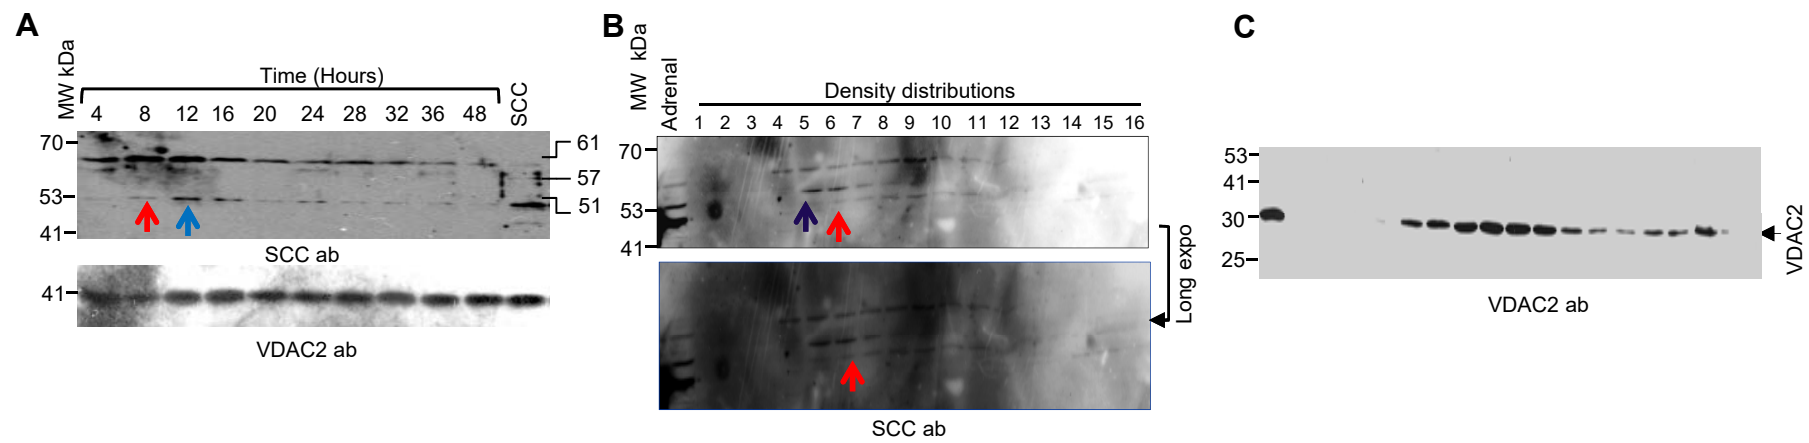

FIGURE S2

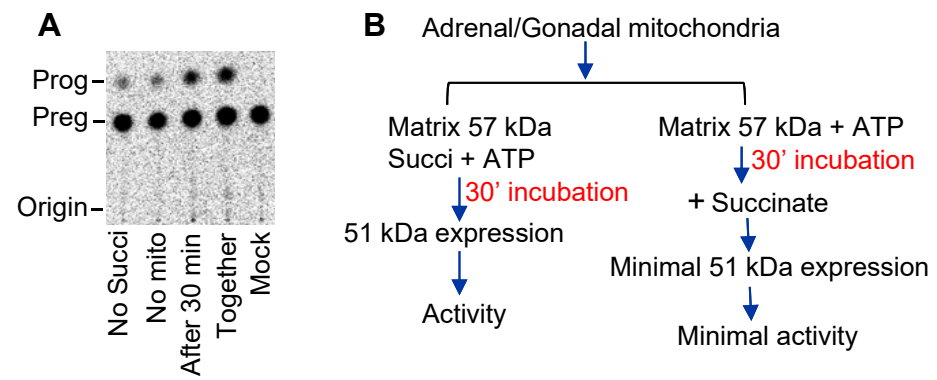

FIGURE S3

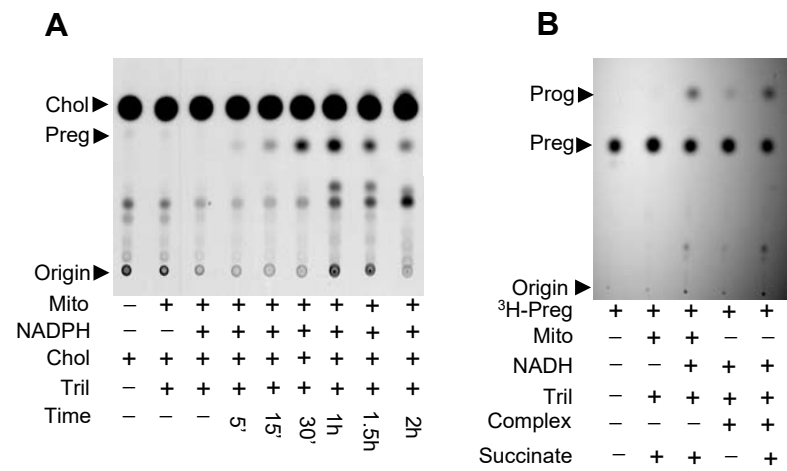

FIGURE S4

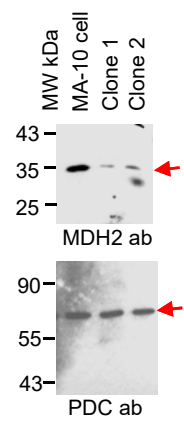

FIGURE S5
